# Supplementary material
Source: publisher figshare collection journal article supplement (https://frontiersin.figshare.com/ndownloader/files/12400721)
Supplement: Supplementary file [file 12400721]

**The real-time PCR reactions and conditions:**

The real-time PCR reactions were carried out in 96-well optical reaction plates (BioRad Laboratories, CA, USA) with 200 nM each specific primer, 2 µl cDNA (20 ng, as described in the experimental procedures), and SYBR® Green Supermix (BioRad Laboratories, CA, USA) using an ABI 7500 Real-Time PCR system (Applied Biosystems, CA, USA). The PCR conditions were as follows: 95°C for 30 sec, followed by 95°C for 15 sec, 60°C for 30 sec and 72°C for 30 sec for 40 cycles.

**Supporting Tables:****Table S1. Primers sequences for real-time PCR.**

| Gene Name | Primer Sequence (5'-3')                       | Gene length (bp) | Amplification efficiency (%) <sup>*</sup> | Correlation coefficients (r <sup>2</sup> ) |
|-----------|-----------------------------------------------|------------------|-------------------------------------------|--------------------------------------------|
| β-actin   | CACCACACCTTCTACAAC<br>TCTGGGTCATCTTCTCAC      | 106              | 95.41                                     | 0.9991                                     |
| IL-2      | CAAACGGTGACCTACTTCA<br>AGCTTGAGGTTCTCGGGATT   | 115              | 96.75                                     | 0.9985                                     |
| IL-6      | CGTCGACAAAATCTCTGCAA<br>TTCCCTCAAACTCGTTCTGG  | 148              | 98.73                                     | 0.9994                                     |
| IL-10     | CCTTGTCGGAAATGATCCAG<br>AGGGCAGAAAACGATGACAG  | 150              | 98.68                                     | 0.9993                                     |
| TGF-β1    | GAACTGCTGTGTTTCGTCAGC<br>TCCAGGCTCCAGATGTAAGG | 126              | 98.98                                     | 0.9996                                     |
| IFN-γ     | GAACGGCAGCTCTGAGAAAC<br>GGTTAGATTTTGCGACAGG   | 131              | 98.02                                     | 0.9982                                     |
| IL-17     | TTGTAAAGGCAGGGGTCATC<br>GGTGGAGCGCTTGTGATAAT  | 149              | 96.68                                     | 0.9978                                     |

<sup>\*</sup> Amplification efficiency (%) =  $(10^{-1/\text{slope}} - 1) \times 100$

**Table S2. Reagents for real-time PCR**

| Reagent                      | Volume         |
|------------------------------|----------------|
| 2×ChamQSYBR qPCR Master Mix  | 10.0 µl        |
| Primer 1 (10µM)              | 0.4 µl         |
| Primer 2 (10µM)              | 0.4 µl         |
| 50×ROX Reference Dye 2 (50×) | 0.4 µl         |
| cDNA                         | X µl           |
| ddH <sub>2</sub> O           | Total= 20.0 µl |

**Table S3. Cyclic conditions for real-time PCR.**

|         |                   |          |       |        |
|---------|-------------------|----------|-------|--------|
| Stage 1 | Pre-degeneration  | Reps: 1  | 95 °C | 30 sec |
| Stage 2 | Circular reaction | Reps: 40 | 95 °C | 10 sec |
|         |                   |          | 60 °C | 30 sec |
| Stage 3 | Melt curve        | Reps: 1  | 95 °C | 15 sec |
|         |                   |          | 60 °C | 60 sec |
|         |                   |          | 95 °C | 15 sec |
